# Supplementary material for: Human infrapatellar fat pad mesenchymal stem cells show immunomodulatory exosomal signatures
Source: PubMed Central journal article supplement (PMC8897449; doi:10.1038/s41598-022-07569-7), 2022-03-04

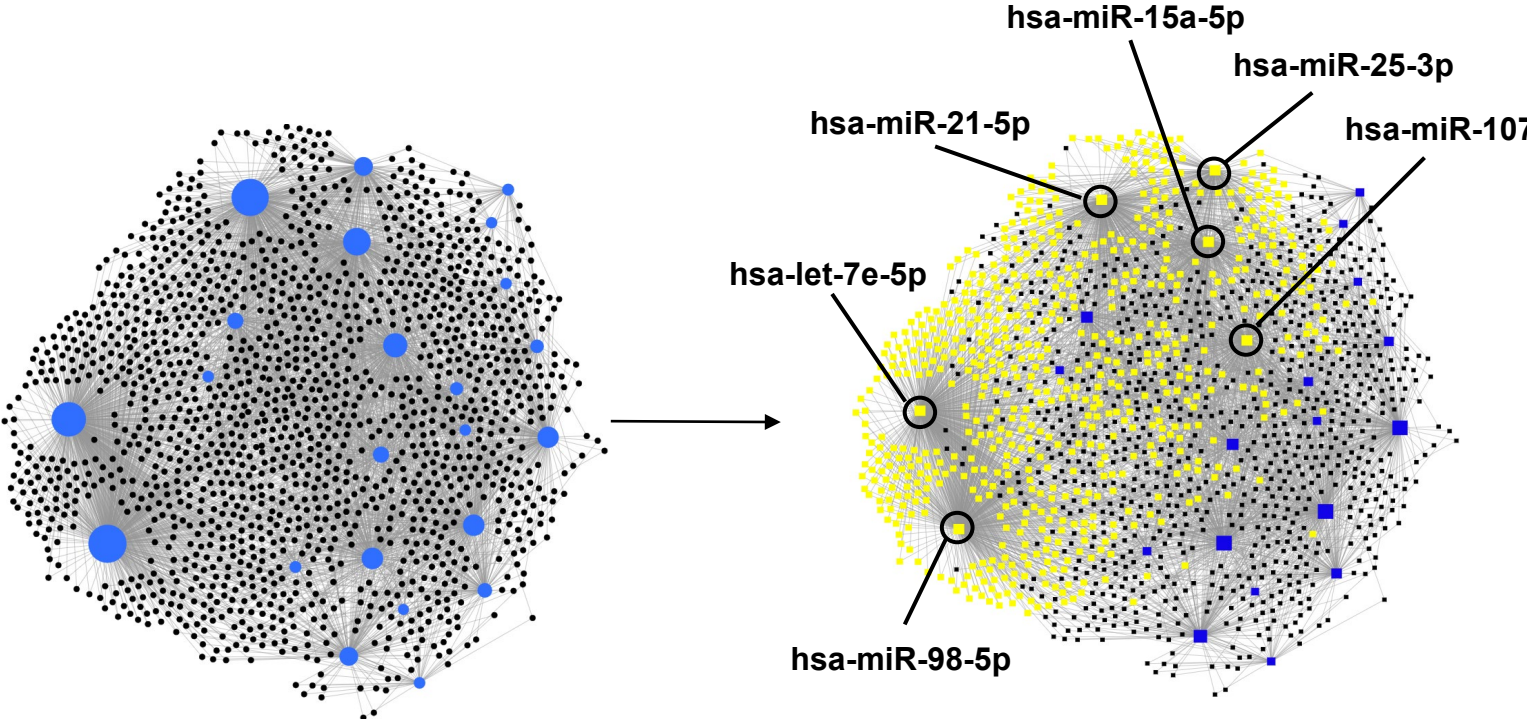

Supplement: 41598_2022_7569_MOESM1_ESM.pdf [file 41598_2022_7569_MOESM1_ESM.pdf]
